# Supplementary material for: Comparative lipidomics of 5-Fluorouracil–sensitive and –resistant colorectal cancer cells reveals altered sphingomyelin and ceramide controlled by acid sphingomyelinase (SMPD1)
Source: PubMed Central journal article supplement (PMC7145850; doi:10.1038/s41598-020-62823-0), 2020-04-09
Supplement: 41598_2020_62823_MOESM6_ESM.pdf [file 41598_2020_62823_MOESM6_ESM.pdf]

**Comparative lipidomics of 5-Fluorouracil-sensitive and –resistant colorectal cancer cells reveals altered sphingomyelin and ceramide controlled by acid sphingomyelinase (SMPD1)**

Jae Hun Jung<sup>1</sup>, Kohei Taniguchi<sup>3</sup>, Hyeong Min Lee<sup>1</sup>, Min Young Lee<sup>4</sup>, Raju Bandu<sup>1</sup>, Kazumasa Komura<sup>3</sup>, Kil Yeon Lee<sup>5</sup>, Yukihiro Akao<sup>6,\*\*</sup>, and Kwang Pyo Kim<sup>1,2,\*</sup>

<sup>1</sup>Department of Applied Chemistry, Institute of Natural Science, Global Center for Pharmaceutical Ingredient Materials, Kyung Hee University, Yongin, Republic of Korea. <sup>2</sup>Department of Biomedical Science and Technology, Kyung Hee Medical Science Research Institute, Kyung Hee University, Seoul, Republic of Korea. <sup>3</sup>Translational Research Program, Osaka Medical College, 2-7 Daigaku-machi, Takatsuki, Osaka 569-8686, Japan. <sup>4</sup>Institute for Systems Biology, Seattle, WA, USA. <sup>5</sup>Department of Surgery, College of Medicine, Kyung Hee University, Seoul, Republic of Korea. <sup>6</sup>United Graduate School of Drug Discovery and Medical Information Sciences, Gifu University, 1-1 Yanagido, Gifu 501-1193, Japan.

\* Corresponding author. Department of Applied Chemistry, Institute of Natural Science, Global Center for Pharmaceutical Ingredient Materials, Kyung Hee University, Yongin, Republic of Korea.

\*\* Corresponding author. United Graduate School of Drug Discovery and Medical Information Sciences, Gifu University, 1-1 Yanagido, Gifu 501-1193, Japan.

E-mail address: kimkp@khu.ac.kr (K.P.Kim), yakao@gifu-u.ac.jp (Y. Akao)

**A** m/z 798.6 PC {34:1} [M+K]<sup>+</sup>

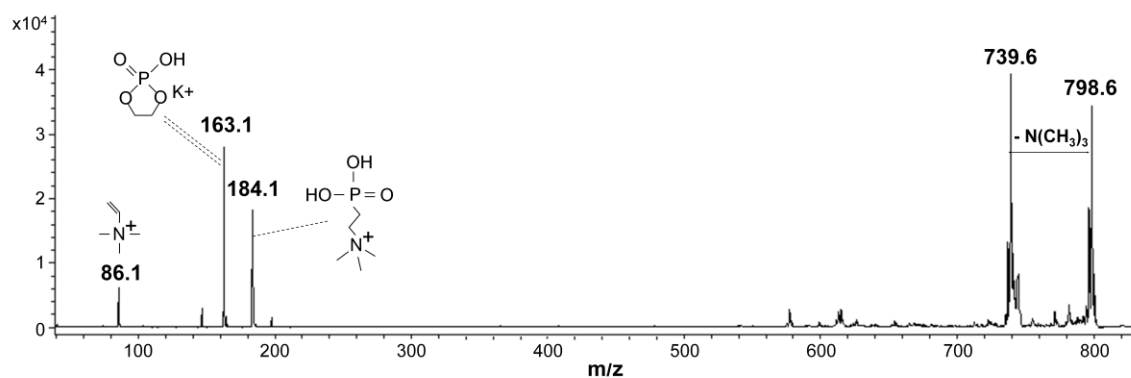

**B** m/z 834.7 PI {16:0/18:1} [M-H]<sup>-</sup>

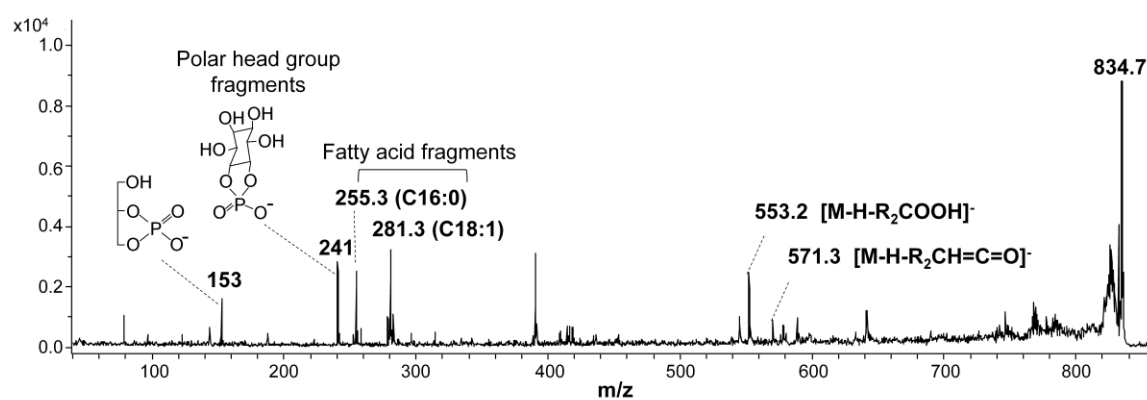

**Supplementary Figure S1. Representative MS/MS spectra using the LIFT technique for phospholipid species.** (A) MS/MS spectra of PC {34:1} [M+K]<sup>+</sup> at m/z 798.6 in positive ion mode and (B) PI {16:0/18:1} [M-H]<sup>-</sup> at 834.7 m/z in negative ion mode.

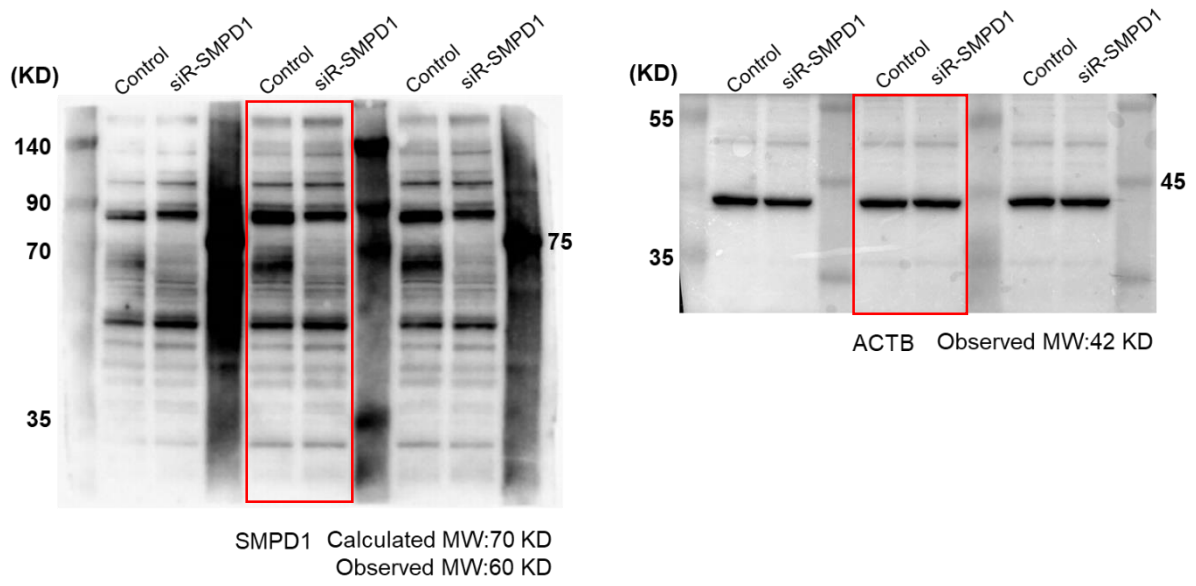

**Supplementary Figure S2.** Full blots of figure 4A. Red box indicated the data used as a figure. The expressions of SMPD1 and ACTB were examined in same gel. The methods regarding gene-silencing and western blot experiments were described in method parts of main manuscript.
